# Supplementary material for: Knowledge, Attitude and Practices of Physicians in Pakistan towards Onco-Hypertension: A Cross-sectional Study
Source: Research Square preprint supplement (doi:10.21203/rs.3.rs-7868022/v1), 2025-11-26
Supplement: Supplementary file 1 [file eec1008bfd8738b55d9f8de2.docx]

**Supplementary Files**

**Knowledge, Attitude and Practices of Physicians in Pakistan towards Onco-Hypertension: A Cross-sectional Study**

Yaqub S. et al., 2025

***Questionnaire***

**Section A. Biodata**

| **Item** | **Question** | **Response Options** |
| --- | --- | --- |
| A1 | **Name and Designation** | ___________________________ |
| A2 | **Specialty** | ☐ Nephrology  ☐ Cardiology  ☐ Pulmonology  ☐ Neurology  ☐ Oncology  ☐ Others: _____ |
| A3 | **Hospital/Clinic of Practice** | ___________________________ |

**Section B. Knowledge and Awareness of Onco-Hypertension**

| **No.** | **Question** | **Response Options** |
| --- | --- | --- |
| B1 | How often have you encountered cancer patients? | ☐ Never ☐ Sometimes ☐ Often ☐ Always |
| B2 | How often have you encountered cancer patients with hypertension? | ☐ Never ☐ Sometimes ☐ Often ☐ Always |
| B3 | How would you rate your knowledge on Onco-hypertension? | 1 ☐ 2 ☐ 3 ☐ 4 ☐ 5 ☐  (1 = Very Poor, 5 = Excellent) |
| B4 | Do you find it difficult to treat Onco-hypertension? | ☐ Yes ☐ No |
| B5 | What difficulties do you face in treating Onco-hypertension? *(select all that apply)* | ☐ Fear of disease ☐ Concomitant comorbidities  ☐ Drug–drug interactions ☐ Terminal stage of cancer |
| B6 | What do you think are the most common causes of new-onset hypertension in cancer patients? *(select all that apply)* | ☐ Disease stress ☐ Anxiety ☐ Corticosteroids ☐ Tyrosine kinase inhibitors (e.g., Lenvatinib, Imatinib) ☐ Cisplatin ☐ Proteasome inhibitors ☐ Enzalutamide ☐ Abiraterone ☐ VEGF inhibitors (e.g., Bevacizumab) ☐ Rituximab ☐ Taxanes ☐ Gemcitabine ☐ Radiation nephropathy |
| B7 | How many instances of Onco-hypertension do you think are due to cancer drug interactions with other therapies? | ☐ 10–20% ☐ 20–30% ☐ 30–40% ☐ 40–50% |
| B8 | What antihypertensive medications do you usually prescribe to cancer patients? *(select all that apply)* | ☐ Same as general population ☐ Beta-blockers ☐ ACE inhibitors ☐ Renin inhibitors ☐ ARBs ☐ Calcium channel blockers |
| B9 | How often do you think it is necessary to adjust antihypertensive medication according to ongoing cancer therapy? | ☐ Never ☐ Sometimes ☐ Often ☐ Always |

**Section C. Practices Toward Onco-Hypertension**

| **No.** | **Question** | **Response Options** |
| --- | --- | --- |
| C1 | How challenging is it to diagnose hypertension in cancer patients? | 1 ☐ 2 ☐ 3 ☐ 4 ☐ 5 ☐ (1 = Not challenging, 5 = Extremely challenging) |
| C2 | Have you ever consulted an oncologist for the management of uncontrolled hypertension in a cancer patient? | ☐ Yes ☐ No |
| C3 | In your clinical practice, patients tend to lose control over hypertension after: | ☐ Losing hope ☐ Prioritizing cancer over hypertension ☐ Losing compliance to antihypertensive or other medications |
| C4 | Do you think interdisciplinary coordination is necessary in the management of Onco-hypertension? | ☐ Yes ☐ No |

**Instructions for Respondents**

- Please mark (☑) the most appropriate response for each item.
- Multiple answers may be selected where indicated.
- All responses will be kept strictly confidential and used solely for research purposes.
